## Correction: Necrosis-inducing peptide has the beneficial effect on killing tumor cells through neuropilin (NRP-1) targeting

**Ji-Young Kim<sup>1,\*</sup>, Ji-Hae Han<sup>1,\*</sup>, Geon Park<sup>2</sup>, Young-Woo Seo<sup>3</sup>, Cheol-Won Yun<sup>4</sup>, Byung-Chul Lee<sup>5</sup>, Jeehyeon Bae<sup>6</sup>, Ae Ran Moon<sup>1,\*</sup> and Tae-Hyoung Kim<sup>1,\*</sup>**

<sup>1</sup> Department of Biochemistry, Chosun University School of Medicine, Dong-Gu, Gwang-Ju, Korea

<sup>2</sup> Department of Laboratory Medicine, Chosun University School of Medicine, Dong-Gu, Gwang-Ju, Korea

<sup>3</sup> Korea Basic Science Institute Gwang-Ju Center, Chonnam National University, Buk-Gu, Gwang-Ju, Korea

<sup>4</sup> School of Life Science and Biotechnology, Korea University, Seoul, Korea

<sup>5</sup> Genoflux. Co., Ltd., Sejong City, Korea

<sup>6</sup> School of Pharmacy, Chung-Ang University, Dongjak-Gu, Seoul, Korea

\* These authors equally contributed to this work

**Published:** June 01, 2018

**Copyright:** Kim et al. This is an open-access article distributed under the terms of the Creative Commons Attribution License 3.0 (CC BY 3.0), which permits unrestricted use, distribution, and reproduction in any medium, provided the original author and source are credited.

**This article has been corrected:** The correct Grant Support information is given below:

### GRANT SUPPORT

This research was supported by the Basic Science Research Program through the National Research Foundation of Korea funded by the Ministry of Education, Science and Technology (Grant no. 2010-0009201 and NRF-2013R1A1A2058254 to TH Kim), by the Ministry of Science, ICT, and Future Planning (NRF-2014R1A2A1A11050442 to TH Kim), and by the National R&D Program for Cancer Control funded by the Ministry of Health and Welfare of the Korean government (Grant no. HI14C2025 to TH Kim).

Original article: Oncotarget. 2016; 7:32449-32461. <https://doi.org/10.18632/oncotarget.8719>
